# Supplementary material
Source: publisher figshare collection journal article supplement (https://geolsoc.figshare.com/ndownloader/files/24153881)
Supplement: Supplementary file 1 [file 24153881]

## Sheet: Magnetostratigraphic results
			Sampling Information							Tilt correction		Data analysis
	Sample name	Sample site	Stratigraphic height (m)	Sampling section	GPS Latitude	GPS longitude	Sample type	Sample strike (*)	Sample dip (*)	Bedding strike (*)	Bedding dip(*)	Class	MAD value (*)	Polarity	Declination (*)	Inclination (*)	NRM Intensity
	MG28A5A	MG28	1900	Aínsa	042˚,23',40.5"	000˚,07',35.7"	Hand sample	148	18	160	20	C	N/A	N/A	N/A	N/A	0.422
	MG28A4A	MG28	1900	Aínsa	042˚,23',40.6"	000˚,07',35.8"	Hand sample	148	18	160	20	C	N/A	N/A	N/A	N/A	0.186
	MG28A3A	MG28	1900	Aínsa	042˚,23',40.7"	000˚,07',35.9"	Hand sample	148	18	160	20	C	N/A	N/A	N/A	N/A	0.438
	MG28A2A	MG28	1900	Aínsa	042˚,23',40.8"	000˚,07',35.10"	Hand sample	148	18	160	20	C	N/A	N/A	N/A	N/A	0.442
	MG28A1A	MG28	1900	Aínsa	042˚,23',40.9"	000˚,07',35.11"	Hand sample	148	18	160	20	C	N/A	N/A	N/A	N/A	0.396
	MG27B1A	MG27	1893	Aínsa	042˚,23',38.9"	000˚,07',37.7"	Hand sample	123	19	136	27	C	N/A	N/A	N/A	N/A	0.329
	MG27A2A	MG27	1893	Aínsa	042˚,23',38.9"	000˚,07',37.7"	Hand sample	139	15	136	27	A	10.02	N	20.1	24.5	0.281
	MG27A1A	MG27	1893	Aínsa	042˚,23',38.10"	000˚,07',37.8"	Hand sample	139	15	136	27	C	N/A	N/A	N/A	N/A	0.342
	MG26B3A	MG26	1886	Aínsa	042˚,23',39.4"	000˚,07',38.4"	Hand sample	173	19	120	25	C	N/A	N/A	N/A	N/A	0.244
	MG26B1A	MG26	1886	Aínsa	042˚,23',39.5"	000˚,07',38.5"	Hand sample	173	19	120	25	A	18.4	N	28.34	19.44	0.164
	MG26A4A	MG26	1886	Aínsa	042˚,23',39.4"	000˚,07',38.4"	Hand sample	125	22	120	25	A	7.4	N	327.7	62.3	0.208
	MG26A3A	MG26	1886	Aínsa	042˚,23',39.5"	000˚,07',38.5"	Hand sample	125	22	120	25	A	4.75	N	353.76	42.8	0.331
	MG26A2A	MG26	1886	Aínsa	042˚,23',39.6"	000˚,07',38.6"	Hand sample	125	22	120	25	C	N/A	N/A	N/A	N/A	0.25
	MG26A1A	MG26	1886	Aínsa	042˚,23',39.7"	000˚,07',38.7"	Hand sample	125	22	120	25	C	N/A	N/A	N/A	N/A	0.157
	MG25A4A	MG25	1871	Aínsa	042˚,23',39.7"	000˚,07',39.6"	Hand sample	159	23	175	23	A	7	N	11.2	31.1	0.159
	MG25A3A	MG25	1871	Aínsa	042˚,23',39.8"	000˚,07',39.7"	Hand sample	159	23	175	23	A	6.6	R	324.6	-22.31	0.222
	MG25A2A	MG25	1871	Aínsa	042˚,23',39.9"	000˚,07',39.8"	Hand sample	159	23	175	23	A	14.5	N	32.4	52.9	0.17
	MG25A1A	MG25	1871	Aínsa	042˚,23',39.10"	000˚,07',39.9"	Hand sample	159	23	175	23	A	18.6	R	10.7	-22	0.205
	MG24B1A	MG24	1859	Aínsa	042˚,23',39.6"	000˚,07',40.6"	Hand sample	108	22	155	25	C	N/A	N/A	N/A	N/A	0.225
	MG24A4A	MG24	1859	Aínsa	042˚,23',39.6"	000˚,07',40.6"	Hand sample	106	20	155	25	C	N/A	N/A	N/A	N/A	0.078
	MG24A3A	MG24	1859	Aínsa	042˚,23',39.7"	000˚,07',40.7"	Hand sample	106	20	155	25	A	4	OP-N	316.6	55.7	0.165
	MG24A2A	MG24	1859	Aínsa	042˚,23',39.8"	000˚,07',40.8"	Hand sample	106	20	155	25	A	10.8	OP-N	310.7	68.3	0.09
	MG24A1A	MG24	1859	Aínsa	042˚,23',39.9"	000˚,07',40.9"	Hand sample	106	20	155	25	C	N/A	N/A	N/A	N/A	0.104
	MG23B2A	MG23	1849	Aínsa	042˚,23',41.11"	000˚,07',42.9"	Hand sample	125	23	135	24	C	N/A	N/A	N/A	N/A	0.081
	MG23B1A	MG23	1849	Aínsa	042˚,23',41.12"	000˚,07',42.10"	Hand sample	125	23	135	24	A	17.1	N	213.8	81.5	0.036
	MG23A3A	MG23	1849	Aínsa	042˚,23',41.11"	000˚,07',42.9"	Hand sample	131	22	135	24	C	N/A	N/A	N/A	N/A	0.094
	MG23A2A	MG23	1849	Aínsa	042˚,23',41.12"	000˚,07',42.10"	Hand sample	131	22	135	24	A	7.6	N	59.7	61.6	0.08
	MG23A1A	MG23	1849	Aínsa	042˚,23',41.13"	000˚,07',42.11"	Hand sample	131	22	135	24	C	N/A	N/A	N/A	N/A	0.233
	MG22B5A	MG22	1839	Aínsa	042˚,23',42.1"	000˚,07',43.9"	Hand sample	143	22	153	20	C	N/A	N/A	N/A	N/A	0.519
	MG22B4A	MG22	1839	Aínsa	042˚,23',42.2"	000˚,07',43.10"	Hand sample	143	22	153	20	C	N/A	N/A	N/A	N/A	0.452
	MG22B3A	MG22	1839	Aínsa	042˚,23',42.3"	000˚,07',43.11"	Hand sample	143	22	153	20	C	N/A	N/A	N/A	N/A	0.471
	MG22B2A	MG22	1839	Aínsa	042˚,23',42.4"	000˚,07',43.12"	Hand sample	143	22	153	20	C	N/A	N/A	N/A	N/A	0.583
	MG22B1A	MG22	1839	Aínsa	042˚,23',42.5"	000˚,07',43.13"	Hand sample	143	22	153	20	C	N/A	N/A	N/A	N/A	0.306
	MG22A2A	MG22	1839	Aínsa	042˚,23',42.1"	000˚,07',43.9"	Hand sample	150	23	153	20	A	12.4	OP-N	327.8	11.6	0.336
	MG22A1A	MG22	1839	Aínsa	042˚,23',42.2"	000˚,07',43.10"	Hand sample	150	23	153	20	A	10	OP-N	16.2	25.2	0.511
	MG21A3A	MG21	1829	Aínsa	042˚,23',44.0"	000˚,07',46.2"	Hand sample	126	21	120	24	C	N/A	N/A	N/A	N/A	0.214
	MG21A2A	MG21	1829	Aínsa	042˚,23',44.1"	000˚,07',46.3"	Hand sample	126	21	120	24	C	N/A	N/A	N/A	N/A	0.224
	MG21A1A	MG21	1829	Aínsa	042˚,23',44.2"	000˚,07',46.4"	Hand sample	126	21	120	24	C	N/A	N/A	N/A	N/A	0.182
	MG20A5A	MG20	1819	Aínsa	042˚,23',44.6"	000˚,07',47.0"	Hand sample	160	25	130	24	C	N/A	N/A	N/A	N/A	0.076
	MG20A4A	MG20	1819	Aínsa	042˚,23',44.7"	000˚,07',47.1"	Hand sample	160	25	130	24	A	21.7	OP-N	338.8	51.6	0.301
	MG20A3A	MG20	1819	Aínsa	042˚,23',44.8"	000˚,07',47.2"	Hand sample	160	25	130	24	C	N/A	N/A	N/A	N/A	0.189
	MG20A2A	MG20	1819	Aínsa	042˚,23',44.9"	000˚,07',47.3"	Hand sample	160	25	130	24	C	N/A	N/A	N/A	N/A	0.29
	MG20A1A	MG20	1819	Aínsa	042˚,23',44.10"	000˚,07',47.4"	Hand sample	160	25	130	24	C	N/A	N/A	N/A	N/A	0.234
	MG19A	MG19	1809	Aínsa	042˚,23',47.5"	000˚,07',47.6"	Core sample	150	15	120	16	N/A	N/A	N/A	N/A	N/A	N/A
	MG18A4A	MG18	1797	Aínsa	042˚,23',48.1"	000˚,07',48.4"	Hand sample	150	30	120	20	C	N/A	N/A	N/A	N/A	0.417
	MG18A3A	MG18	1797	Aínsa	042˚,23',48.2"	000˚,07',48.5"	Hand sample	150	30	120	20	A	9.1	OP-R	336.9	-39.2	0.483
	MG18A2A	MG18	1797	Aínsa	042˚,23',48.3"	000˚,07',48.6"	Hand sample	150	30	120	20	A	14.7	OP-R	334.8	-5.3	0.258
	MG18A1A	MG18	1797	Aínsa	042˚,23',48.4"	000˚,07',48.7"	Hand sample	150	30	120	20	C	N/A	N/A	N/A	N/A	0.094
	MG17A4A	MG17	1782	Aínsa	042˚,23',49.3"	000˚,07',49.5"	Hand sample	139	22	130	22	C	N/A	N/A	N/A	N/A	0.327
	MG17A3A	MG17	1782	Aínsa	042˚,23',49.4"	000˚,07',49.6"	Hand sample	139	22	130	22	A	15.4	OP-R	333.6	-13.5	0.437
	MG17A2A	MG17	1782	Aínsa	042˚,23',49.5"	000˚,07',49.7"	Hand sample	139	22	130	22	C	N/A	N/A	N/A	N/A	0.27
	MG17A1A	MG17	1782	Aínsa	042˚,23',49.6"	000˚,07',49.8"	Hand sample	139	22	130	22	C	N/A	N/A	N/A	N/A	0.293
	MG16A5A	MG16	1765	Aínsa	042˚,23',51.4"	000˚,07',53.7"	Hand sample	157	17	155	25	A	23.4	OP-N	287.2	27	0.204
	MG16A4A	MG16	1765	Aínsa	042˚,23',51.5"	000˚,07',53.8"	Hand sample	157	17	155	25	C	N/A	N/A	N/A	N/A	0.276
	MG16A3A	MG16	1765	Aínsa	042˚,23',51.6"	000˚,07',53.9"	Hand sample	157	17	155	25	C	N/A	N/A	N/A	N/A	0.171
	MG16A2A	MG16	1765	Aínsa	042˚,23',51.7"	000˚,07',53.10"	Hand sample	157	17	155	25	A	13.3	OP?	342.5	23.6	0.181
	MG16A1A	MG16	1765	Aínsa	042˚,23',51.8"	000˚,07',53.11"	Hand sample	157	17	155	25	B	25.6	OP?	31.2	15.8	0.317
	MG15A3A	MG15	1760	Aínsa	042˚,23',51.8"	000˚,07',53.4"	Hand sample	142	26	135	20	A	18.6	N	20.2	37.5	0.503
	MG15A2A	MG15	1760	Aínsa	042˚,23',51.9"	000˚,07',53.5"	Hand sample	142	26	135	20	A	18.5	N	1.2	43.4	0.546
	MG15A1A	MG15	1760	Aínsa	042˚,23',51.10"	000˚,07',53.6"	Hand sample	142	26	135	20	C	N/A	N/A	N/A	N/A	0.173
	MG14A4A	MG14	1750	Aínsa	042˚,23',53.4"	000˚,07',56.5"	Hand sample	138	28	142	17	A	10.8	N	21.3	21.1	0.288
	MG14A3A	MG14	1750	Aínsa	042˚,23',53.5"	000˚,07',56.6"	Hand sample	138	28	142	17	A	7.3	N	14.3	37.8	0.465
	MG14A2A	MG14	1750	Aínsa	042˚,23',53.6"	000˚,07',56.7"	Hand sample	138	28	142	17	A	7.5	N	14.5	32.7	0.407
	MG14A1A	MG14	1750	Aínsa	042˚,23',53.7"	000˚,07',56.8"	Hand sample	138	28	142	17	A	20	N	329.9	29	0.212
	MG13A2A	MG13	1740	Aínsa	042˚,23',54.8"	000˚,07',58.6"	Hand sample	137	20	124	20	C	N/A	N/A	N/A	N/A	0.375
	MG13A1A	MG13	1740	Aínsa	042˚,23',54.9"	000˚,07',58.7"	Hand sample	137	20	124	20	A	13.6	N	19.6	18.7	0.384
	MG12A2A	MG12	1727	Aínsa	042˚,23',56.3"	000˚,08',00.8"	Hand sample	112	19	142	35	C	N/A	N/A	N/A	N/A	0.165
	MG12A1A	MG12	1727	Aínsa	042˚,23',56.4"	000˚,08',00.9"	Hand sample	112	19	142	35	C	N/A	N/A	N/A	N/A	0.171
	MG11B2A	MG11	1705	Aínsa	042˚,23',56.5"	000˚,08',03.1"	Hand sample	148	24	142	29	C	N/A	N/A	N/A	N/A	0.293
	MG11B1A	MG11	1705	Aínsa	042˚,23',56.6"	000˚,08',03.2"	Hand sample	148	24	142	29	A	14.2	N	338.8	66.5	0.29
	MG11A2A	MG11	1705	Aínsa	042˚,23',56.5"	000˚,08',03.1"	Hand sample	147	25	142	29	A	14.8	N	322.9	40.4	0.467
	MG11A1A	MG11	1705	Aínsa	042˚,23',56.6"	000˚,08',03.2"	Hand sample	147	25	142	29	C	N/A	N/A	N/A	N/A	0.182
	MG10A3A	MG10	1700	Aínsa	042˚,23',56.7"	000˚,08',04.3"	Hand sample	148	30	148	30	A	14.5	N	270.9	56.5	0.165
	MG10A2A	MG10	1700	Aínsa	042˚,23',56.8"	000˚,08',04.4"	Hand sample	148	30	148	30	A	8.4	N	323.6	52.6	0.196
	MG10A1A	MG10	1700	Aínsa	042˚,23',56.9"	000˚,08',04.5"	Hand sample	148	30	148	30	C	N/A	N/A	N/A	N/A	0.116
	MG9B2A	MG9	1677	Aínsa	042˚,23',56.9"	000˚,08',07.8"	Hand sample	142	17	163	25	C	N/A	N/A	N/A	N/A	0.071
	MG9B1A	MG9	1677	Aínsa	042˚,23',56.10"	000˚,08',07.9"	Hand sample	142	17	163	25	C	N/A	N/A	N/A	N/A	0.183
	MG9A4A	MG9	1677	Aínsa	042˚,23',56.9"	000˚,08',07.8"	Hand sample	158	21	163	25	A	14.3	R	199.9	-23.12	0.09
	MG9A3A	MG9	1677	Aínsa	042˚,23',56.10"	000˚,08',07.9"	Hand sample	158	21	163	25	C	N/A	N/A	N/A	N/A	0.253
	MG9A2A	MG9	1677	Aínsa	042˚,23',56.11"	000˚,08',07.10"	Hand sample	158	21	163	25	B	30.32	R	264.7	-37.6	0.17
	MG9A1A	MG9	1677	Aínsa	042˚,23',56.12"	000˚,08',07.11"	Hand sample	158	21	163	25	B	22.4	N/A	230.6	0.43	0.353
	MG8A2A	MG8	1657	Aínsa	042˚,23',59.6"	000˚,08',10.2"	Hand sample	157	19	157	19	C	N/A	N/A	N/A	N/A	0.257
	MG8A1A	MG8	1657	Aínsa	042˚,23',59.7"	000˚,08',10.3"	Hand sample	157	19	157	19	C	N/A	N/A	N/A	N/A	0.602
	MG7A3A	MG7	1633	Aínsa	042˚,23',59.8"	000˚,08',12.0"	Hand sample	148	24	148	24	C	N/A	N/A	N/A	N/A	0.138
	MG7A2A	MG7	1633	Aínsa	042˚,23',59.9"	000˚,08',12.1"	Hand sample	148	24	148	24	C	N/A	N/A	N/A	N/A	0.087
	MG7A1A	MG7	1633	Aínsa	042˚,23',59.10"	000˚,08',12.2"	Hand sample	148	24	148	24	C	N/A	N/A	N/A	N/A	0.305
	MG6A1A	MG6	1619	Aínsa	042˚,24',00.8"	000˚,08',14.4"	Hand sample	280	70	135	27	A	12.6	R	208.6	-36.5	0.447
	MG5A1A	MG5	1612	Aínsa	042˚,24',01.3"	000˚,08',14.9"	Hand sample	172	20	172	20	C	N/A	N/A	N/A	N/A	0.683
	MG4A2A	MG4	1600	Aínsa	042˚,24',01.8"	000˚,08',16.1"	Hand sample	131	25	131	25	A	3.3	R	224.6	-25.4	0.4
	MG4A1A	MG4	1600	Aínsa	042˚,24',01.9"	000˚,08',16.2"	Hand sample	131	25	131	25	A	5.9	R?	227	-17.7	0.63
	MG3A2B	MG3	1570	Aínsa	042˚,24',01.7"	000˚,08',17.6"	Hand sample	343	27	140	24	C	N/A	N/A	N/A	N/A	0.601
	MG3A2A	MG3	1570	Aínsa	042˚,24',01.8"	000˚,08',17.7"	Hand sample	343	27	140	24	C	N/A	N/A	N/A	N/A	1.05
	MG3A1B	MG3	1570	Aínsa	042˚,24',01.9"	000˚,08',17.8"	Hand sample	343	27	140	24	C	N/A	N/A	N/A	N/A	0.788
	MG3A1A	MG3	1570	Aínsa	042˚,24',01.10"	000˚,08',17.9"	Hand sample	343	27	140	24	C	N/A	N/A	N/A	N/A	0.811
	MG1A	MG1	1555	Aínsa	042˚,24',02.2"	000˚,08',20.5"	Core sample	185	48	185	48	C	N/A	N/A	N/A	N/A	N/A
	MG2A4A	MG2	1545	Aínsa	042˚,24',01.9"	000˚,08',20.6"	Hand sample	143	21	143	21	C	N/A	N/A	N/A	N/A	0.129
	MG2A3A	MG2	1545	Aínsa	042˚,24',01.10"	000˚,08',20.7"	Hand sample	143	21	143	21	C	N/A	N/A	N/A	N/A	0.266
	MG2A2A	MG2	1545	Aínsa	042˚,24',01.11"	000˚,08',20.8"	Hand sample	143	21	143	21	A	11.3	N	304.3	49.3	0.302
	MG33A5A	MG33	1385	Sieste	042˚,25',43.5"	000˚,04',07.7"	Hand sample	48	18	36	18	C	N/A	N/A	N/A	N/A	0.203
	MG33A4A	MG33	1385	Sieste	042˚,25',43.6"	000˚,04',07.8"	Hand sample	48	18	36	18	C	N/A	OP?	N/A	N/A	0.574
	MG33A3A	MG33	1385	Sieste	042˚,25',43.7"	000˚,04',07.9"	Hand sample	48	18	36	18	C	N/A	N/A	N/A	N/A	0.333
	MG33A2A	MG33	1385	Sieste	042˚,25',43.8"	000˚,04',07.10"	Hand sample	48	18	36	18	C	N/A	N/A	N/A	N/A	0.203
	MG33A1A	MG33	1385	Sieste	042˚,25',43.9"	000˚,04',07.11"	Hand sample	48	18	36	18	A	19.4	OP-N	358.4	15.5	0.22
	MG32A2A	MG32	1362.5	Sieste	042˚,25',44.3"	000˚,04',03.9"	Hand sample	36	18	41	18	A	13	N	46.5	54.7	0.276
	MG32A1A	MG32	1362.5	Sieste	042˚,25',44.4"	000˚,04',03.10"	Hand sample	36	18	41	18	C	N/A	N/A	N/A	N/A	0.313
	MG31A3A	MG31	1337.5	Sieste	042˚,25',45.1"	000˚,04',02.2"	Hand sample	22	26	42	29	C	N/A	N/A	N/A	N/A	0.657
	MG31A2A	MG31	1337.5	Sieste	042˚,25',45.2"	000˚,04',02.3"	Hand sample	22	26	42	29	C	N/A	N/A	N/A	N/A	0.528
	MG31A1A	MG31	1337.5	Sieste	042˚,25',45.3"	000˚,04',02.4"	Hand sample	22	26	42	29	C	N/A	N/A	N/A	N/A	0.592
	MG30A2A	MG30	1327.5	Sieste	042˚,25',45.3"	000˚,04',00.2"	Hand sample	26	33	23	33	C	N/A	N/A	N/A	N/A	0.255
	MG30A1A	MG30	1327.5	Sieste	042˚,25',45.4"	000˚,04',00.3"	Hand sample	26	33	23	33	C	N/A	N/A	N/A	N/A	0.319
	MG36A2A	MG36	1077	Forcaz	042˚,26',03.0"	000˚,07',06.8"	Hand sample	130	25	130	25	A	18.7	R	204.4	-17	0.126
	MG36A1A	MG36	1077	Forcaz	042˚,26',03.1"	000˚,07',06.9"	Hand sample	130	25	130	25	A	9.3	R	177.2	-17.2	0.192
	MG35A5A	MG35	1044	Forcaz	042˚,26',03.6"	000˚,07',08.8"	Hand sample	127	25	127	25	A	15.6	R?	239.6	2.23	0.192
	MG35A4A	MG35	1044	Forcaz	042˚,26',03.7"	000˚,07',08.9"	Hand sample	127	25	127	25	A	14.1	R	229.5	-29.3	0.12
	MG35A3A	MG35	1044	Forcaz	042˚,26',03.8"	000˚,07',08.10"	Hand sample	127	25	127	25	A	14.5	R	231.4	-18.3	0.405
	MG35A2A	MG35	1044	Forcaz	042˚,26',03.9"	000˚,07',08.11"	Hand sample	127	25	127	25	C	N/A	N/A	N/A	N/A	0.192
	MG35A1A	MG35	1044	Forcaz	042˚,26',03.10"	000˚,07',08.12"	Hand sample	127	25	127	25	C	N/A	N/A	N/A	N/A	0.237
	MG34A3A	MG34	1040	Forcaz	042˚,26',04.0"	000˚,07',08.1"	Hand sample	140	22	140	22	A	10.7	R	208.73	-12.8	0.249
	MG34A2A	MG34	1040	Forcaz	042˚,26',04.1"	000˚,07',08.2"	Hand sample	140	22	140	22	C	N/A	N/A	N/A	N/A	0.157
	MG34A1A	MG34	1040	Forcaz	042˚,26',04.2"	000˚,07',08.3"	Hand sample	140	22	140	22	B	27.7	R	232.6	-17.7	0.281
	FZ19B1A	FZ19	1010	Forcaz	042˚,26',3.96"	000˚,7',10.92"	Hand sample	344	26	48	16	B	N/A	OP-N	N/A	N/A	0.256
	FZ19A1A	FZ19	1010	Forcaz	042˚,26',3.96"	000˚,7',10.92"	Hand sample	260	5	48	16	B	N/A	OP-N	N/A	N/A	0.22
	FZ18B2A	FZ18	1000	Forcaz	042˚,26',3.72"	000˚,7',11.64"	Hand sample	246	40	50	23	C	N/A	N/A	N/A	N/A	0.288
	FZ18B1A	FZ18	1000	Forcaz	042˚,26',3.73"	000˚,7',11.65"	Hand sample	246	40	50	23	A	15.9	R?	176.3	8.7	0.65
	FZ18A1A	FZ18	1000	Forcaz	042˚,26',3.72"	000˚,7',11.64"	Hand sample	190	36	50	23	A	12.4	R	193.2	-7.2	0.186
	FZ17B1A	FZ17	990	Forcaz	042˚,26',3.96"	000˚,7',12.12"	Hand sample	88	60	48	22	C	N/A	N/A	N/A	N/A	0.214
	FZ16B1A	FZ16	980	Forcaz	042˚26.073'	000˚ 7.21'	Hand sample	330	10	140	24	B	13.6	R	133.731	-38.3633	0.1921
	FZ15B2	FZ15	970	Forcaz	042˚26.073'	000˚ 7.212'	Hand sample	238	30	134	28	C	N/A	N/A	na	na	0.1114
	FZ14A	FZ14	960	Forcaz	042˚26.079'	000˚ 7.223'	Hand sample	244	38	134	24	C	N/A	N/A	na	na	0.2313
	FZ13A	FZ13	950	Forcaz	042˚26.087'	000˚ 7.236'	Hand sample	244	46	137	24	B	26.2	N	334.686	49.2595	0.2593
	FZ12A1B	FZ12	940	Forcaz	042˚26.083'	000˚ 7.303'	Hand sample	250	30	138	26	C	N/A	N/A	na	na	0.1521
	FZ11A1A	FZ11	930	Forcaz	042˚26.091'	000˚ 7.302'	Hand sample	207	32	132	21	B	27.8	R	223.834	-68.2943	0.3914
	FZ10A1A	FZ10	920	Forcaz	042˚,26',5.46"	000˚,7',18.6"	Hand sample	206	26	50	26	A	8.8	R	217.9	-38.2	0.172
	FZ9A2A	FZ9	910	Forcaz	042˚,26',6.12"	000˚,7',19.56"	Hand sample	232	32	42	20	A	5.1	R	242.2	-23.6	0.317
	FZ9A1A	FZ9	910	Forcaz	042˚,26',6.13"	000˚,7',19.57"	Hand sample	232	32	42	20	A	9	R	196.4	-19.7	0.24
	FZ9B1	FZ9	910	Forcaz	042˚26.102'	000˚ 7.326'	Hand sample	68	60	132	20	B	31.6	R	236.296	-55.0744	0.3002
	BO21A1A	BO21	900	Boltaña	042˚26.815'	000˚ 4.229'	Hand sample	220	10	120	20	B	10.9	N	358.969	64.7914	0.253
	BO20A	BO20	890	Boltaña	042˚,26',48.96"	000˚,4',17.22"	Hand sample	134	10	24	22	N/A	N/A	N/A	N/A	N/A	N/A
	FZ7B1A	FZ7	890	Forcaz	042˚26.068'	000˚ 7.361'	Hand sample	219	20	130	22	A	17.1	R	220.217	-23.0999	0.1385
	BO19B2	BO19	880	Boltaña	042˚26.822'	000˚ 4.292'	Hand sample	166	22	114	22	A	8.7	R	252.032	-51.6829	0.5722
	FZ6A2	FZ6	880	Forcaz	042˚26.077'	000˚ 7.366'	Hand sample	312	13	138	26	B	42.2	R	204.981	30.5047	0.1673
	BO18B2A	BO18	870	Boltaña	042˚,26',54.84"	000˚,4',14.4"	Hand sample	214	26	38	20	B	N/A	R	N/A	N/A	0.304
	BO18B1A	BO18	870	Boltaña	042˚,26',54.85"	000˚,4',14.5"	Hand sample	214	26	38	20	A	12	R	243.4	-40	0.487
	BO18A2A	BO18	870	Boltaña	042˚,26',54.84"	000˚,4',14.4"	Hand sample	200	26	38	20	A	6.7	N?	210.4	-31.5	0.359
	BO18A1B	BO18	870	Boltaña	042˚,26',54.85"	000˚,4',14.5"	Hand sample	200	26	38	20	A	8.3	R	215.6	-18.7	0.354
	BO18A1A	BO18	870	Boltaña	042˚,26',54.86"	000˚,4',14.6"	Hand sample	200	26	38	20	A	15.5	R	220.6	-13	0.486
	FZ5A1A	FZ5	870	Forcaz	042˚26.079'	000˚ 7.377'	Hand sample	202	28	144	24	B	14.3	R	1.96901	14.0518	0.4219
	BO17A2	BO17	860	Boltaña	042˚26.915'	000˚ 4.25'	Hand sample	30	66	130	21	A	14.2	R	216.323	-50.069	0.1558
	FZ4B2	FZ4	860	Forcaz	042˚26.057'	000˚ 7.42'	Hand sample	220	20	130	28	B	26.5	R	25.7871	12.0643	0.2371
	BO16B1B	BO16	850	Boltaña	042˚26.94'	000˚ 4.238'	Hand sample	168	1	118	21	A	3.9	R	195.002	-47.6026	0.5283
	BO16B1B	BO16	850	Boltaña	042˚26.94'	000˚ 4.238'	Hand sample	168	1	118	21	C	N/A	N/A	na	na	0.4816
	FZ3A1A	FZ3	850	Forcaz	042˚26.048'	000˚ 7.439'	Hand sample	305	14	130	30	B	25.1	R	177.76	-7.93929	0.3784
	BO15B2A	BO15	840	Boltaña	042˚,26',56.94"	000˚,4',37.26"	Hand sample	238	36	22	20	A	19.1	R	185.8	-56.8	0.294
	BO15B1A	BO15	840	Boltaña	042˚,26',56.95"	000˚,4',37.27"	Hand sample	238	36	22	20	A	9.6	R	210.9	-32.9	0.54
	BO15A1A	BO15	840	Boltaña	042˚,26',56.94"	000˚,4',37.26"	Hand sample	224	24	22	20	A	12.3	R	246.3	-26.1	0.102
	FZ2B1A	FZ2	840	Forcaz	042˚,26',56.95"	000˚,4',37.27"	Hand sample	168	32	22	20	A	12.6	R	258.2	-17.2	0.708
	FZ2A1A	FZ2	840	Forcaz	042˚,26',56.96"	000˚,4',37.28"	Hand sample	240	38	22	20	A	6	R	228.6	-15.5	0.809
	MG29B	MG29	835	Forcaz	042˚,26',00.0"	000˚,07',38.8"	Core sample	226	62	120	23	N/A	N/A	N/A	N/A	N/A	N/A
	MG29A	MG29	835	Forcaz	042˚,26',00.0"	000˚,07',38.8"	Core sample	222	67	120	23	N/A	N/A	N/A	N/A	N/A	N/A
	BO13A2	BO13	830	Boltaña	042˚26.979'	000˚ 4.248'	Hand sample	324	4	120	24	C	N/A	N/A	na	na	0.42
	BO14A1A	BO14	830	Boltaña	042˚26.962'	000˚ 4.251'	Hand sample	244	22	120	24	B	28.3	R	233.026	-40.6235	0.2208
	BO14B	BO14	830	Boltaña	042˚26.962'	000˚ 4.251'	Hand sample	248	26	120	24	B	34.2	R	220.979	-53.5081	0.2017
	FZ1B	FZ1	830	Forcaz	042˚26.037'	000˚ 7.486'	Hand sample	44	66	134	24	A	14.7	R	225.709	-44.5921	1.2128
	BO13A1A	BO13	820	Boltaña	042˚26.979'	000˚ 4.248'	Hand sample	324	4	114	20	B	34.2	R	228.071	-30.1998	0.3502
	BO12A1A	BO12	810	Boltaña	042˚26.995'	000˚ 4.249'	Hand sample	250	20	116	21	C	N/A	N/A	na	na	0.288
	BO12A1B	BO12	810	Boltaña	042˚26.995'	000˚ 4.249'	Hand sample	250	20	116	21	B	29	R	235.56	-49.1993	0.2908
	BO11A1A	BO11	800	Boltaña	042˚27.005'	000˚ 4.254'	Hand sample	316	2	115	22	C	N/A	N/A	na	na	0.2055
	BO11A1B	BO11	800	Boltaña	042˚27.005'	000˚ 4.254'	Hand sample	316	2	115	22	B	26.9	R	208.092	39.5505	0.52
	BO10A1A	BO10	790	Boltaña	042˚27.018'	000˚ 4.259'	Hand sample	316	20	108	23	A	17.8	R	205.55	-59.0765	0.4115
	BO10A1B	BO10	790	Boltaña	042˚27.018'	000˚ 4.259'	Hand sample	316	20	108	23	A	15.4	R	233.963	-52.4674	0.4446
	BO9A1	BO9	780	Boltaña	042˚27.023'	000˚ 4.269'	Hand sample	240	24	116	22	C	N/A	N/A	na	na	0.6843
	BO9A2A	BO9	780	Boltaña	042˚27.023'	000˚ 4.269'	Hand sample	240	24	116	22	A	10.8	R	229.621	-51.4039	0.6336
	BO8A	BO8	770	Boltaña	042˚27.043'	000˚ 4.266'	Core sample	270	13	108	24	A	10.4	R	228.237	-49.4959	0.6412
	BO8B	BO8	770	Boltaña	042˚27.043'	000˚ 4.266'	Core sample	241	26	108	24	B	31.4	R	184.219	-27.8051	0.2571
	BO8D	BO8	770	Boltaña	042˚27.043'	000˚ 4.266'	Core sample	272	16	108	24	C	N/A	N/A	na	na	0.3843
	LB68A	LB68	770	Labuerda	042˚27.258'	000˚ 6.866'	Core sample	182	28	120	20	C	N/A	N/A	na	na	0.2381
	LB68D	LB68	770	Labuerda	042˚27.258'	000˚ 6.866'	Core sample	184	31	120	20	B	18.3	R	307.674	-6.46941	0.2959
	LB68E	LB68	770	Labuerda	042˚27.258'	000˚ 6.866'	Core sample	182	32	120	20	A	15.4	R	199.313	-52.6547	0.3211
	BO7A	BO7	760	Boltaña	042˚27.039'	000˚ 4.368'	Core sample	199	40	120	20	A	8.5	R	229.259	-44.4369	0.7021
	LB67A	LB67	760	Labuerda	042˚27.276'	000˚ 6.863'	Core sample	165	29	119	20	A	16.7	R	219.849	-41.9188	0.4599
	LB67B	LB67	760	Labuerda	042˚27.276'	000˚ 6.863'	Core sample	165	23	119	20	A	9.8	R	216.613	-47.4683	0.2717
	LB67D	LB67	760	Labuerda	042˚27.276'	000˚ 6.863'	Core sample	177	31	119	20	A	19.5	R	201.749	-49.6832	0.3764
	BO6B	BO6	750	Boltaña	042˚27.047'	000˚ 4.386'	Core sample	166	32	112	18	A	7.8	R	229.327	-60.3633	0.4917
	BO6C	BO6	750	Boltaña	042˚27.047'	000˚ 4.386'	Core sample	172	33	112	18	C	N/A	N/A	na	na	0.5024
	BO6E	BO6	750	Boltaña	042˚27.047'	000˚ 4.386'	Core sample	176	29	112	18	A	7.2	R	216.42	-60.7276	0.4667
	LB66B	LB66	750	Labuerda	042˚27.285'	000˚ 6.883'	Core sample	255	45	120	20	A	11.4	R	216.627	-37.7913	0.4224
	LB66C2	LB66	750	Labuerda	042˚27.285'	000˚ 6.883'	Core sample	255	44	120	20	B	36	R	205.019	-19.3302	0.49
	LB66E	LB66	750	Labuerda	042˚27.285'	000˚ 6.883'	Core sample	265	49	120	20	A	9.3	R	193.588	-30.198	0.2826
	BO5A	BO5	740	Boltaña	042˚27.054'	000˚ 4.401'	Core sample	140	41	116	22	A	18.5	R	211.103	-42.9333	0.8693
	BO5C	BO5	740	Boltaña	042˚27.054'	000˚ 4.401'	Core sample	146	41	116	22	A	11.6	R	223.701	-44.9164	1.0152
	LB65A	LB65	740	Labuerda	042˚27.279'	000˚ 6.904'	Core sample	204	38	120	24	A	15.5	R	226.575	-46.7788	0.1808
	LB65B	LB65	740	Labuerda	042˚27.279'	000˚ 6.904'	Core sample	197	34	120	24	A	15	R	204.1	-32.5	0.1494
	BO4B	BO4	730	Boltaña	042˚27.071'	000˚ 4.425'	Core sample	167	48	114	22	C	N/A	N/A	na	na	0.3148
	BO4C	BO4	730	Boltaña	042˚27.071'	000˚ 4.425'	Core sample	162	33	114	22	B	7.3	R	237.375	-39.6149	0.5881
	LB64A	LB64	730	Labuerda	042˚27.283'	000˚ 6.914'	Core sample	173	27	120	26	A	15.9	R	234.147	-47.9029	0.4742
	LB64B	LB64	730	Labuerda	042˚27.283'	000˚ 6.914'	Core sample	177	27	120	26	B	33.7	R	270.211	15.5581	0.4465
	LB64C	LB64	730	Labuerda	042˚27.283'	000˚ 6.914'	Core sample	171	26	120	26	B	35.9	R	214.382	-66.4614	0.328
	BO3A	BO3	720	Boltaña	042˚27.098'	000˚ 4.503'	Core sample	185	50	112	22	B	16.4	R	231.958	-33.0396	0.423
	BO3C	BO3	720	Boltaña	042˚27.098'	000˚ 4.503'	Core sample	187	53	112	22	B	24.7	R	223.937	-13.2727	0.5405
	LB63B	LB63	720	Labuerda	042˚27.285'	000˚ 6.932'	Core sample	133	12	126	20	B	25.6	R	198.718	-42.3915	0.5191
	LB63C	LB63	720	Labuerda	042˚27.285'	000˚ 6.932'	Core sample	185	33	126	20	B	27.9	R	242.968	-11.8988	0.5404
	LB63D	LB63	720	Labuerda	042˚27.285'	000˚ 6.932'	Core sample	186	27	126	20	B	22.6	R	190.279	-46.9023	0.3537
	BO2A	BO2	710	Boltaña	042˚27.106'	000˚ 4.492'	Core sample	212	36	114	24	B	34.1	R	201.996	-46.0893	0.2452
	BO2B	BO2	710	Boltaña	042˚27.106'	000˚ 4.492'	Core sample	192	30	114	24	A	15.4	R	223.223	-57.8635	0.503
	BO2E	BO2	710	Boltaña	042˚27.106'	000˚ 4.492'	Core sample	184	53	114	24	A	15.4	R	217.589	-50.9379	0.3407
	LB62A	LB62	710	Labuerda	042˚27.268'	000˚ 6.982'	Core sample	233	37	138	20	B	24.5	R	218.715	-27.5704	0.2945
	LB62B2	LB62	710	Labuerda	042˚27.268'	000˚ 6.982'	Core sample	235	41	138	20	B	9.6	R	217.247	-66.7012	0.344
	LB62E	LB62	710	Labuerda	042˚27.268'	000˚ 6.982'	Core sample	242	42	138	20	B	30.8	R	225.262	-12.2779	0.3477
	BO1A	BO1	700	Boltaña	042˚27.113'	000˚ 4.463'	Core sample	127	44	110	18	A	18.6	R	201.244	-43.4966	0.3566
	BO1C	BO1	700	Boltaña	042˚27.113'	000˚ 4.463'	Core sample	155	30	110	18	B	27.2	R	218.489	-57.9646	0.2911
	LB61A2	LB61	700	Labuerda	042˚27.26'	000˚ 7.006'	Core sample	194	30	126	26	A	15.5	R	224.202	-55.9338	0.2433
	LB61B1	LB61	700	Labuerda	042˚27.26'	000˚ 7.006'	Core sample	194	27	126	21	B	38.6	R	245.914	-28.0604	0.2058
	LB61B2	LB61	700	Labuerda	042˚27.26'	000˚ 7.006'	Core sample	194	27	126	21	A	12.8	R	195.263	-45.2688	0.2606
	LB60B	LB60	690	Labuerda	042˚27.266'	000˚ 7.018'	Core sample	251	34	126	26	B	40	R	269.802	-43.3649	0.807
	LB60D	LB60	690	Labuerda	042˚27.266'	000˚ 7.018'	Core sample	249	40	126	26	A	17.2	R	249.458	-56.2862	0.682
	LB59A	LB59	680	Labuerda	042˚27.274'	000˚ 7.031'	Core sample	141	16	130	25	B	18.6	R	219.033	-21.6968	0.3712
	LB59C	LB59	680	Labuerda	042˚27.274'	000˚ 7.031'	Core sample	151	33	130	25	B	30.1	R	193.364	-69.0058	0.2964
	LB59D	LB59	680	Labuerda	042˚27.274'	000˚ 7.031'	Core sample	175	40	130	25	B	31.7	R	206.337	-41.1621	0.2448
	LB58B	LB58	670	Labuerda	042˚27.281'	000˚ 7.043'	Core sample	305	14	134	26	A	11.9	R	291.08	9.09691	0.5738
	LB58D2	LB58	670	Labuerda	042˚27.281'	000˚ 7.043'	Core sample	350	21	134	26	A	10	R	212.886	-42.9391	0.1896
	LB57A	LB57	660	Labuerda	042˚27.281'	000˚ 7.085'	Core sample	184	49	132	25	A	7.6	R	240.944	-45.2122	0.4726
	LB57B	LB57	660	Labuerda	042˚27.281'	000˚ 7.085'	Core sample	184	46	132	25	B	26.8	R	238.423	-47.4754	0.373
	LB57D	LB57	660	Labuerda	042˚27.281'	000˚ 7.085'	Core sample	173	39	132	25	A	7.3	R	227.47	-60.6334	1.0461
	LB56A2	LB56	650	Labuerda	042˚27.282'	000˚ 7.066'	Core sample	306	47	130	36	A	7.4	R	214.709	-62.9267	0.4486
	LB56B	LB56	650	Labuerda	042˚27.282'	000˚ 7.066'	Core sample	305	52	130	36	A	8	R	223.139	-62.9742	0.3596
	LB56D	LB56	650	Labuerda	042˚27.282'	000˚ 7.066'	Core sample	292	24	130	36	B	26.3	R	348.309	-64.3317	0.4719
	LB55C2	LB55	640	Labuerda	042˚27.283'	000˚ 7.086'	Core sample	227	53	133	30	B	8.7	R	194.881	-56.2871	0.2787
	LB55D2	LB55	640	Labuerda	042˚27.283'	000˚ 7.086'	Core sample	220	67	133	30	A	15.2	R	198.439	-44.0716	0.3026
	LB55E2	LB55	640	Labuerda	042˚27.283'	000˚ 7.086'	Core sample	231	51	133	30	B	16.1	R	258.009	-21.9683	0.5978
	LB54A	LB54	630	Labuerda	042˚27.279'	000˚ 7.102'	Core sample	65	74	132	20	B	23	R	214.48	-54.4811	0.1838
	LB54C	LB54	630	Labuerda	042˚27.279'	000˚ 7.102'	Core sample	265	21	132	20	C	N/A	N/A	na	na	0.1878
	LB54D	LB54	630	Labuerda	042˚27.279'	000˚ 7.102'	Core sample	277	31	132	20	B	13.1	R	302.196	-66.0109	0.4085
	LB53B	LB53	620	Labuerda	042˚27.274'	000˚ 7.116'	Core sample	98	63	132	20	B	18.7	R	212.253	-57.5082	0.2147
	LB53D	LB53	620	Labuerda	042˚27.274'	000˚ 7.116'	Core sample	133	65	132	20	B	7.7	R	204.089	-39.1183	0.5867
	LB52A	LB52	610	Labuerda	042˚27.289'	000˚ 7.127'	Core sample	48	76	130	20	C	N/A	N/A	na	na	0.1574
	LB52B	LB52	610	Labuerda	042˚27.289'	000˚ 7.127'	Core sample	75	78	130	20	B	19.5	R	231.329	-33.6727	0.3146
	LB52D	LB52	610	Labuerda	042˚27.289'	000˚ 7.127'	Core sample	53	75	130	20	B	13.6	R	197.906	-42.6482	0.1177
	LB51A	LB51	600	Labuerda	042˚27.288'	000˚ 7.16'	Core sample	269	23	130	20	B	13.9	N	280.775	54.4496	0.1869
	LB51B	LB51	600	Labuerda	042˚27.288'	000˚ 7.16'	Core sample	265	26	130	20	B	7.7	N	277.673	18.141	0.4904
	LB50B	LB50	590	Labuerda	042˚27.297'	000˚ 7.189'	Core sample	87	78	132	20	A	12.9	N	328.047	80.8815	0.1937
	LB50C	LB50	590	Labuerda	042˚27.297'	000˚ 7.189'	Core sample	108	74	132	20	A	11.6	N	171.273	75.8129	0.5551
	LB49A	LB49	580	Labuerda	042˚27.293'	000˚ 7.203'	Core sample	174	23	130	22	B	5	N	254.647	65.3014	0.1334
	LB49B	LB49	580	Labuerda	042˚27.293'	000˚ 7.203'	Core sample	163	6	130	22	B	4.5	N	232.455	84.6359	0.2672
	LB49C	LB49	580	Labuerda	042˚27.293'	000˚ 7.203'	Core sample	165	10	130	22	B	9.9	N	290.962	77.5263	0.1136
	LB48A2	LB48	570	Labuerda	042˚27.301'	000˚ 7.211'	Core sample	246	26	124	20	A	9.6	N	302.034	61.6973	0.2541
	LB48B2	LB48	570	Labuerda	042˚27.301'	000˚ 7.211'	Core sample	257	23	124	20	C	13.5	N/A	24.9609	41.1033	0.1544
	LB48D	LB48	570	Labuerda	042˚27.301'	000˚ 7.211'	Core sample	275	22	124	20	A	11.2	N	320.322	40.9424	0.4008
	LB47A	LB47	560	Labuerda	042˚27.298'	000˚ 7.235'	Core sample	152	15	140	28	B	16.6	N	217.863	8.83884	0.707
	LB47C	LB47	560	Labuerda	042˚27.298'	000˚ 7.235'	Core sample	149	27	140	28	A	9	N	283.117	44.6744	0.2439
	LB47D	LB47	560	Labuerda	042˚27.298'	000˚ 7.235'	Core sample	157	27	140	28	B	7.1	N	201.394	32.84	1.0359
	LB46B	LB46	550	Labuerda	042˚27.307'	000˚ 7.25'	Core sample	307	11	128	22	B	13	N	297.466	56.2553	0.2966
	LB46C	LB46	550	Labuerda	042˚27.307'	000˚ 7.25'	Core sample	33	64	128	22	A	13.4	N	168.151	81.2189	0.7791
	LB46D	LB46	550	Labuerda	042˚27.307'	000˚ 7.25'	Core sample	33	70	128	22	C	6.1	N/A	129.899	83.0443	0.6241
	LB45A	LB45	540	Labuerda	042˚27.298'	000˚ 7.27'	Core sample	145	38	126	22	B	29	N	47.3393	58.226	0.2908
	LB45B	LB45	540	Labuerda	042˚27.298'	000˚ 7.27'	Core sample	149	42	126	22	C	12.5	N/A	165.931	14.8108	0.2906
	LB45D	LB45	540	Labuerda	042˚27.298'	000˚ 7.27'	Core sample	153	55	126	22	B	19.6	R	120.984	45.192	0.2909
	LB44A1	LB44	530	Labuerda	042˚27.3'	000˚ 7.308'	Core sample	190	27	136	22	C	N/A	N/A	na	na	0.2345
	LB44A2	LB44	530	Labuerda	042˚27.3'	000˚ 7.308'	Core sample	190	27	136	22	B	15.2	N	289.802	31.3715	0.2702
	LB44C	LB44	530	Labuerda	042˚27.3'	000˚ 7.308'	Core sample	177	28	136	22	B	34.4	R	198.629	-10.1938	0.4754
	LB43A	LB43	520	Labuerda	042˚27.301'	000˚ 7.314'	Core sample	163	4	138	22	B	8.4	N	317.967	72.383	0.4603
	LB43B	LB43	520	Labuerda	042˚27.301'	000˚ 7.314'	Core sample	164	9	138	22	B	11.2	N	305.773	68.6821	0.3684
	LB43C	LB43	520	Labuerda	042˚27.301'	000˚ 7.314'	Core sample	167	2	138	22	A	10.1	N	318.354	71.3933	0.5179
	LB42B	LB42	510	Labuerda	042˚27.311'	000˚ 7.323'	Core sample	49	73	136	26	B	24.4	R	298.454	53.7291	0.261
	LB42C	LB42	510	Labuerda	042˚27.311'	000˚ 7.323'	Core sample	48	69	136	26	C	6.4	N/A	295.679	55.2273	0.1839
	LB42D	LB42	510	Labuerda	042˚27.311'	000˚ 7.323'	Core sample	39	70	136	26	C	14.2	N/A	287.048	72.6542	0.438
	LB41A	LB41	500	Labuerda	042˚27.316'	000˚ 7.335'	Core sample	353	9	134	26	A	26.9	N	29.3021	65.9618	0.433
	LB41B	LB41	500	Labuerda	042˚27.316'	000˚ 7.335'	Core sample	351	7	134	26	A	17.6	N	3.9595	54.9583	0.8159
	LB40A	LB40	490	Labuerda	042˚27.312'	000˚ 7.35'	Core sample	240	76	132	20	A	8.6	N	310.729	50.7552	2.0452
	LB40B	LB40	490	Labuerda	042˚27.312'	000˚ 7.35'	Core sample	50	63	132	20	B	7.6	N	273.334	71.7314	0.5792
	LB39A1	LB39	480	Labuerda	042˚27.316'	000˚ 7.373'	Core sample	201	59	138	22	B	22	N	253.618	66.6329	0.2458
	LB39A2	LB39	480	Labuerda	042˚27.316'	000˚ 7.373'	Core sample	201	59	138	22	A	9.3	N	21.0877	71.2414	0.3378
	LB39B	LB39	480	Labuerda	042˚27.316'	000˚ 7.373'	Core sample	189	59	138	22	B	5.8	N	305.644	61.7141	0.5144
	LB38A	LB38	470	Labuerda	042˚27.324'	000˚ 7.389'	Core sample	202	21	136	26	B	33.6	N	102.866	-56.8951	1.294
	LB38B	LB38	470	Labuerda	042˚27.324'	000˚ 7.389'	Core sample	276	40	136	26	B	14.6	N	344.334	11.8409	0.9342
	LB38C	LB38	470	Labuerda	042˚27.324'	000˚ 7.389'	Core sample	224	38	136	26	B	14.2	N	328.497	36.5206	0.6694
	LB37A	LB37	460	Labuerda	042˚27.325'	000˚ 7.406'	Core sample	170	38	136	26	A	8.5	N	36.2165	63.4943	0.5088
	LB37B2	LB37	460	Labuerda	042˚27.325'	000˚ 7.406'	Core sample	191	43	136	26	A	14.6	N	31.08	67.0608	0.3907
	LB37C	LB37	460	Labuerda	042˚27.325'	000˚ 7.406'	Core sample	174	41	136	26	A	23.3	N	331.619	66.2259	0.3435
	LB36B	LB36	450	Labuerda	042˚27.332'	000˚ 7.428'	Core sample	40	62	132	20	B	21.7	N	72.99	33.5898	0.5186
	LB36C	LB36	450	Labuerda	042˚27.332'	000˚ 7.428'	Core sample	52	60	132	20	B	41.3	N	70.8322	57.9463	0.5408
	LB36D	LB36	450	Labuerda	042˚27.332'	000˚ 7.428'	Core sample	51	64	132	20	B	14.2	N	331.734	65.7119	0.4465
	LB35B	LB35	440	Labuerda	042˚27.336'	000˚ 7.44'	Core sample	54	65	133	22	B	10.6	N	332.779	58.4858	2.6421
	LB35C1	LB35	440	Labuerda	042˚27.336'	000˚ 7.44'	Core sample	44	68	133	22	B	32.3	N	253.111	57.6845	1.4863
	LB35C2	LB35	440	Labuerda	042˚27.336'	000˚ 7.44'	Core sample	44	68	133	22	B	8.5	N	66.9998	56.7523	1.7279
	LB34A1	LB34	430	Labuerda	042˚27.342'	000˚ 7.453'	Core sample	47	74	132	21	A	14.5	N	358.907	67.2047	0.2657
	LB34A2	LB34	430	Labuerda	042˚27.342'	000˚ 7.453'	Core sample	47	74	132	21	B	30.1	N	110.135	58.872	0.2066
	LB34B	LB34	430	Labuerda	042˚27.342'	000˚ 7.453'	Core sample	50	70	132	21	B	10.3	N	320.366	73.8302	0.1269
	LB33A1	LB33	420	Labuerda	042˚27.346'	000˚ 7.476'	Core sample	80	78	134	20	B	8.6	N	268.962	59.0624	0.3817
	LB33A2	LB33	420	Labuerda	042˚27.346'	000˚ 7.476'	Core sample	80	78	134	20	A	13.5	N	42.9406	59.1978	0.3913
	LB33B1	LB33	420	Labuerda	042˚27.346'	000˚ 7.476'	Core sample	74	78	134	20	B	18.5	N	347.219	61.9124	0.3453
	LB32A	LB32	410	Labuerda	042˚27.347'	000˚ 7.494'	Core sample	67	64	134	20	B	11.9	N	320.605	66.908	0.354
	LB32B	LB32	410	Labuerda	042˚27.347'	000˚ 7.494'	Core sample	52	73	134	20	B	6.2	N	320.403	61.4218	0.3031
	LB32C	LB32	410	Labuerda	042˚27.347'	000˚ 7.494'	Core sample	69	70	134	20	A	6.2	N	54.5171	36.7243	0.6271
	LB31A	LB31	400	Labuerda	042˚27.349'	000˚ 7.511'	Core sample	44	59	138	21	A	6.6	N	40.4294	60.8864	0.5458
	LB31B	LB31	400	Labuerda	042˚27.349'	000˚ 7.511'	Core sample	47	57	138	21	B	17.7	N	36.8393	50.0143	0.6388
	LB31C	LB31	400	Labuerda	042˚27.349'	000˚ 7.511'	Core sample	51	56	138	21	A	12.3	N	42.497	58.9381	0.5286
	LB30A	LB30	390	Labuerda	042˚27.349'	000˚ 7.532'	Core sample	44	61	140	22	A	7.6	N	29.0988	55.4344	0.3259
	LB30C	LB30	390	Labuerda	042˚27.349'	000˚ 7.532'	Core sample	56	59	140	22	B	17.6	N	21.5741	70.1661	0.4761
	LB30E	LB30	390	Labuerda	042˚27.349'	000˚ 7.532'	Core sample	246	29	140	22	A	10.2	N	30.6834	49.7138	0.4819
	LB29A2	LB29	380	Labuerda	042˚27.352'	000˚ 7.548'	Core sample	51	70	136	22	A	10.9	N	22.6592	43.9296	0.4277
	LB29B1	LB29	380	Labuerda	042˚27.352'	000˚ 7.548'	Core sample	30	74	136	22	A	20.8	N	29.1688	58.7019	0.4666
	LB29C2	LB29	380	Labuerda	042˚27.352'	000˚ 7.548'	Core sample	36	71	136	22	A	12.3	N	22.6669	48.2898	0.4275
	LB28A1	LB28	370	Labuerda	042˚27.353'	000˚ 7.564'	Core sample	54	59	130	30	A	19.9	N	20.7954	57.0216	0.1623
	LB28A2	LB28	370	Labuerda	042˚27.353'	000˚ 7.564'	Core sample	54	59	130	30	C	N/A	N/A	na	na	0.1623
	LB28C2	LB28	370	Labuerda	042˚27.353'	000˚ 7.564'	Core sample	62	57	130	30	B	19	N	61.0157	75.1016	0.2116
	LB27B1	LB27	360	Labuerda	042˚27.373'	000˚ 7.575'	Core sample	240	34	140	23	B	35.1	N	324.871	72.31	0.1975
	LB27B2	LB27	360	Labuerda	042˚27.373'	000˚ 7.575'	Core sample	240	34	140	23	B	24	N	28.9808	52.9588	0.8722
	LB27C	LB27	360	Labuerda	042˚27.373'	000˚ 7.575'	Core sample	225	32	140	23	B	8.5	N	309.512	74.1168	0.2592
	LB26B	LB26	350	Labuerda	042˚27.387'	000˚ 7.573'	Core sample	241	38	140	28	A	12.7	N	326.466	48.6569	0.2271
	LB26C1	LB26	350	Labuerda	042˚27.387'	000˚ 7.573'	Core sample	242	40	140	28	A	6.9	N	296.253	48.8278	0.3212
	LB26D	LB26	350	Labuerda	042˚27.387'	000˚ 7.573'	Core sample	245	24	140	28	B	7.9	N	308.169	53.8061	0.1915
	LB25A	LB25	340	Labuerda	042˚27.424'	000˚ 7.579'	Core sample	279	23	126	24	A	9.6	N	358.888	64.4694	0.6164
	LB25B	LB25	340	Labuerda	042˚27.424'	000˚ 7.579'	Core sample	255	28	126	24	B	9.2	N	320.586	64.884	0.3718
	LB25C	LB25	340	Labuerda	042˚27.424'	000˚ 7.579'	Core sample	255	37	126	24	A	13.9	N	350.28	62.6294	0.3497
	LB24A	LB24	330	Labuerda	042˚27.455'	000˚ 7.566'	Core sample	40	59	138	22	A	13.2	N	16.8876	66.341	0.2261
	LB24B	LB24	330	Labuerda	042˚27.455'	000˚ 7.566'	Core sample	50	56	138	22	A	3.3	N	314.306	77.1204	0.4869
	LB24D2	LB24	330	Labuerda	042˚27.455'	000˚ 7.566'	Core sample	288	30	138	22	A	21.9	N	336.53	46.2773	1.1003
	LB23A1	LB23	320	Labuerda	042˚27.508'	000˚ 7.554'	Core sample	255	40	120	18	B	15	N	219.09	83.5767	0.968
	LB23B	LB23	320	Labuerda	042˚27.508'	000˚ 7.554'	Core sample	267	51	120	18	A	12.7	N	334.227	57.3595	1.4532
	LB23D1	LB23	320	Labuerda	042˚27.508'	000˚ 7.554'	Core sample	201	34	120	18	C	23.7	N/A	62.2857	24.3843	0.3603
	LB22A	LB22	310	Labuerda	042˚27.541'	000˚ 7.556'	Core sample	174	22	134	25	C	N/A	N/A	na	na	0.2225
	LB22B	LB22	310	Labuerda	042˚27.541'	000˚ 7.556'	Core sample	174	19	134	25	B	9	R	266.54	60.858	0.3152
	LB22C	LB22	310	Labuerda	042˚27.541'	000˚ 7.556'	Core sample	190	25	134	25	C	10.5	na	321.478	66.9032	0.4339
	LB21A	LB21	300	Labuerda	042˚27.556'	000˚ 7.565'	Core sample	284	21	126	19	A	27.1	N	353.907	47.1183	0.5018
	LB21B	LB21	300	Labuerda	042˚27.556'	000˚ 7.565'	Core sample	291	19	126	19	A	9.1	N	319.135	74.718	0.2925
	LB21C	LB21	300	Labuerda	042˚27.556'	000˚ 7.565'	Core sample	318	31	126	19	A	17.4	N	334.407	47.572	0.2688
	LB20A	LB20	290	Labuerda	042˚27.562'	000˚ 7.582'	Core sample	142	31	122	21	C	N/A	N/A	na	na	0.3311
	LB20B	LB20	290	Labuerda	042˚27.562'	000˚ 7.582'	Core sample	144	24	122	21	C	N/A	N/A	na	na	0.3248
	LB20C	LB20	290	Labuerda	042˚27.562'	000˚ 7.582'	Core sample	129	7	122	21	B	4.9	R	291.821	74.8719	0.1969
	LB19B	LB19	280	Labuerda	042˚27.572'	000˚ 7.591'	Core sample	104	15	122	21	B	17.6	N	5.04929	74.3812	2.5218
	LB19D	LB19	280	Labuerda	042˚27.572'	000˚ 7.591'	Core sample	97	30	122	21	C	17.9	N/A	327.785	55.9136	0.6734
	LB18A	LB18	270	Labuerda	042˚27.603'	000˚ 7.536'	Core sample	221	11	122	20	B	12.2	N	193.615	21.9354	0.7167
	LB18B1	LB18	270	Labuerda	042˚27.603'	000˚ 7.536'	Core sample	202	32	122	20	A	14.4	N	297.263	57.0449	1.308
	LB18B2	LB18	270	Labuerda	042˚27.603'	000˚ 7.536'	Core sample	202	32	122	20	A	12.3	N	304.662	56.0378	1.6157
	LB17C1	LB17	260	Labuerda	042˚27.641'	000˚ 7.516'	Core sample	304	10	132	22	B	9.9	R	303.194	4.21448	0.2536
	LB17C2	LB17	260	Labuerda	042˚27.641'	000˚ 7.516'	Core sample	304	10	132	22	B	11.9	N	7.07936	3.78341	0.276
	LB16A1	LB16	250	Labuerda	042˚27.653'	000˚ 7.544'	Core sample	132	29	124	17	A	8.2	N	221.161	74.4991	0.4368
	LB16A2	LB16	250	Labuerda	042˚27.653'	000˚ 7.544'	Core sample	132	29	124	17	A	7.5	N	319.105	66.3295	0.381
	LB16B	LB16	250	Labuerda	042˚27.653'	000˚ 7.544'	Core sample	131	22	124	17	A	10.5	N	273.316	77.4972	0.3508
	LB15A	LB15	240	Labuerda	042˚27.666'	000˚ 7.541'	Core sample	151	20	130	18	C	N/A	N/A	na	na	0.5059
	LB15B1	LB15	240	Labuerda	042˚27.666'	000˚ 7.541'	Core sample	158	19	130	18	C	N/A	N/A	na	na	0.191
	LB15B2	LB15	240	Labuerda	042˚27.666'	000˚ 7.541'	Core sample	158	19	130	18	C	N/A	N/A	na	na	0.2329
	LB14A	LB14	230	Labuerda	042˚27.699'	000˚ 7.527'	Core sample	214	52	130	25	A	16.3	N	197.793	64.6707	0.4029
	LB14B	LB14	230	Labuerda	042˚27.699'	000˚ 7.527'	Core sample	245	43	130	25	B	42.1	N	345.733	4.15373	0.926
	LB13A	LB13	220	Labuerda	042˚27.706'	000˚ 7.534'	Core sample	156	18	132	18	A	8.2	N	328.804	70.7793	0.636
	LB13B	LB13	220	Labuerda	042˚27.706'	000˚ 7.534'	Core sample	154	15	132	18	A	11.3	N	311.508	75.1145	0.2764
	LB13C1	LB13	220	Labuerda	042˚27.706'	000˚ 7.534'	Core sample	163	19	132	18	B	23.9	N	292.715	81.646	0.4304
	GE12A1	GE12	210	Labuerda	042˚23.658'	000˚ 11.165'	Hand sample	276	38	194	24	B	25.2	N	351.038	51.8122	0.3172
	GE12B1A	GE12	210	Labuerda	042˚27.723'	000˚ 7.537'	Hand sample	294	30	194	24	B	16.3	N	69.8194	51.5379	0.3957
	LB12B1	LB12	210	Labuerda	042˚27.723'	000˚ 7.537'	Core sample	189	24	128	18	C	N/A	N/A	na	na	0.3385
	LB12D1	LB12	210	Labuerda	042˚27.723'	000˚ 7.537'	Core sample	208	26	128	18	A	11.9	N	328.529	63.7329	0.371
	GE11B2A	GE11	200	Gerbe	042˚,23',39.84"	000˚,11',10.26"	Hand sample	250	29	102	20	A	6.8	N	54	25	0.42
	GE11B1A	GE11	200	Gerbe	042˚,23',39.85"	000˚,11',10.27"	Hand sample	250	29	102	20	B	N/A	N	N/A	N/A	0.512
	GE11A2B	GE11	200	Gerbe	042˚,23',39.84"	000˚,11',10.26"	Hand sample	255	30	102	20	A	4.5	N	60.4	12.6	0.529
	GE11A2A	GE11	200	Gerbe	042˚,23',39.85"	000˚,11',10.27"	Hand sample	255	30	102	20	A	4.9	N	51.1	13	0.58
	GE11A1B	GE11	200	Gerbe	042˚,23',39.86"	000˚,11',10.28"	Hand sample	255	30	102	20	A	5	N	50.8	17.2	0.413
	GE11A1A	GE11	200	Gerbe	042˚,23',39.87"	000˚,11',10.29"	Hand sample	255	30	102	20	A	8.8	N	51.5	20.1	0.336
	LB11A1	LB11	200	Labuerda	042˚27.735'	000˚ 7.545'	Core sample	136	21	118	24	C	N/A	N/A	na	na	1.8357
	LB11A2	LB11	200	Labuerda	042˚27.735'	000˚ 7.545'	Core sample	136	21	118	24	A	8.2	N	3.74887	65.1417	2.5
	LB11B	LB11	200	Labuerda	042˚27.735'	000˚ 7.545'	Core sample	340	61	118	24	B	8.3	N	290.07	67.1029	1.6974
	GE10A	GE10	190	Gerbe	042˚23.666'	000˚ 11.177'	Hand sample	94	72	190	20	A	13.6	N	12.388	44.694	0.3592
	LB10A	LB10	190	Labuerda	042˚27.751'	000˚ 7.548'	Core sample	144	49	134	20	A	9.5	N	293.76	63.2865	4.7063
	LB10B	LB10	190	Labuerda	042˚27.751'	000˚ 7.548'	Core sample	111	11	134	20	A	9	N	302.704	81.8445	0.8
	LB10C	LB10	190	Labuerda	042˚27.751'	000˚ 7.548'	Core sample	151	50	134	20	A	9.9	N	328.452	67.4151	4.4722
	GE9A1A	GE9	180	Gerbe	042˚23.655'	000˚ 11.197'	Hand sample	287	35	188	20	A	22.2	N	11.1811	30.1487	0.2172
	LB9A1	LB9	180	Labuerda	042˚27.774'	000˚ 7.55'	Core sample	149	18	120	18	C	N/A	N/A	na	na	0.2685
	LB9A2	LB9	180	Labuerda	042˚27.774'	000˚ 7.55'	Core sample	149	18	120	18	B	13.8	N	310.764	47.2069	0.854
	LB9B1	LB9	180	Labuerda	042˚27.774'	000˚ 7.55'	Core sample	147	17	120	18	B	23.3	N	290.383	66.7419	1.0187
	GE8B2A	GE8	170	Gerbe	042˚,23',39.12"	000˚,11',12.12"	Hand sample	290	20	96	22	A	4.4	N	71.23	57.9	0.259
	GE8B1B	GE8	170	Gerbe	042˚,23',39.13"	000˚,11',12.13"	Hand sample	290	20	96	22	A	9.2	N	37.3	43.7	0.298
	GE8B1A	GE8	170	Gerbe	042˚,23',39.14"	000˚,11',12.14"	Hand sample	290	20	96	22	A	19.7	N	60.3	39.2	0.324
	GE8A	GE8	170	Gerbe	042˚23.652'	000˚ 11.202'	Hand sample	284	40	186	22	B	20.5	N	357.81	39.1365	0.1903
	LB8B	LB8	170	Labuerda	042˚27.831'	000˚ 7.499'	Core sample	226	8	130	20	A	8.9	N	320.58	59.312	1.81
	LB8C2	LB8	170	Labuerda	042˚27.831'	000˚ 7.499'	Core sample	222	9	130	20	B	9.2	N	267.651	61.7151	1.5451
	LB8D2	LB8	170	Labuerda	042˚27.831'	000˚ 7.499'	Core sample	227	8	130	20	A	8.3	N	334.92	58.1131	2.0532
	GE7A	GE7	160	Gerbe	042˚23.655'	000˚ 11.243'	Hand sample	92	70	190	20	A	20.8	N	357.758	46.8256	0.1888
	LB7A	LB7	160	Labuerda	042˚27.843'	000˚ 7.508'	Core sample	129	14	130	18	A	9.6	N	12.9256	54.3835	0.4884
	LB7B1	LB7	160	Labuerda	042˚27.843'	000˚ 7.508'	Core sample	124	10	130	18	C	N/A	N/A	na	na	0.489
	LB7D	LB7	160	Labuerda	042˚27.843'	000˚ 7.508'	Core sample	136	6	130	18	C	N/A	N/A	na	na	1.32
	GE6B1	GE6	150	Gerbe	042˚23.621'	000˚ 11.218'	Hand sample	279	60	188	20	C	N/A	N/A	na	na	0.4531
	LB6A	LB6	150	Labuerda	042˚27.86'	000˚ 7.511'	Core sample	144	12	130	19	A	23.2	N	48.1643	21.5239	0.3477
	LB6B1	LB6	150	Labuerda	042˚27.86'	000˚ 7.511'	Core sample	135	4	130	19	B	12.4	N	3.6164	67.2418	0.349
	LB6C2	LB6	150	Labuerda	042˚27.86'	000˚ 7.511'	Core sample	159	7	130	19	B	3.8	N	263.493	57.5374	0.5682
	GE5A1A	GE5	140	Gerbe	042˚23.625'	000˚ 11.239'	Hand sample	287	28	184	20	B	33.5	N	15.8089	16.7938	0.2725
	LB5A	LB5	140	Labuerda	042˚27.883'	000˚ 7.513'	Core sample	325	14	124	19	A	13	N	48.1996	10.4336	0.2971
	LB5B2	LB5	140	Labuerda	042˚27.883'	000˚ 7.513'	Core sample	193	42	124	19	A	6.8	N	352.046	73.707	3.1
	LB5C1	LB5	140	Labuerda	042˚27.883'	000˚ 7.513'	Core sample	190	41	124	19	A	7.3	N	317.048	66.7372	5.0043
	GE4A2	GE4	130	Gerbe	042˚23.606'	000˚ 11.25'	Hand sample	105	74	180	20	B	36	N	348.206	16.4928	0.3861
	LB4A2	LB4	130	Labuerda	042˚27.91'	000˚ 7.524'	Core sample	269	19	120	19	C	N/A	N/A	na	na	0.476
	LB4B1	LB4	130	Labuerda	042˚27.91'	000˚ 7.524'	Core sample	269	13	120	19	B	19.6	N	4.23852	53.9579	0.35
	LB4B2	LB4	130	Labuerda	042˚27.91'	000˚ 7.524'	Core sample	269	13	120	19	B	20.2	N	18.3933	52.2202	0.3455
	GE3B2A	GE3	120	Gerbe	042˚,23',35.82"	000˚,11',16.92"	Hand sample	288	32	100	20	A	5.5	N	61.9	15.7	0.44
	GE3B1A	GE3	120	Gerbe	042˚,23',35.83"	000˚,11',16.93"	Hand sample	288	32	100	20	C	N/A	N/A	N/A	N/A	0.36
	GE3A	GE3	120	Gerbe	042˚23.597'	000˚ 11.282'	Hand sample	294	23	190	20	B	21.4	N	16.6608	-14.731	0.7845
	LB3A1	LB3	120	Labuerda	042˚27.924'	000˚ 7.535'	Core sample	277	10	118	19	A	12	N	356.962	53.5503	0.7483
	LB3B1	LB3	120	Labuerda	042˚27.924'	000˚ 7.535'	Core sample	293	8	118	19	A	9.9	N	332.63	62.6389	2.01
	LB3C1	LB3	120	Labuerda	042˚27.924'	000˚ 7.535'	Core sample	275	11	118	19	A	8.6	N	44.5345	39.664	0.592
	GE2B1A	GE2	110	Gerbe	042˚23.6'	000˚ 11.299'	Hand sample	278	30	170	20	B	18	N	39.7918	-59.5924	0.5864
	LB2A1	LB2	110	Labuerda	042˚27.944'	000˚ 7.552'	Core sample	201	50	110	18	A	13.1	N	16.8952	76.2883	0.54
	LB2B	LB2	110	Labuerda	042˚27.944'	000˚ 7.552'	Core sample	17	58	110	18	A	7.6	N	358.312	78.5911	1.8223
	LB2C	LB2	110	Labuerda	042˚27.944'	000˚ 7.552'	Core sample	9	60	110	18	A	18	N	37.4487	35.4027	0.6143
	GE1A1A	GE1	100	Gerbe	042˚23.611'	000˚ 11.31'	Hand sample	286	12	174	22	A	11.7	N	97.3498	19.252	0.4875
	LB1A1	LB1	100	Labuerda	042˚27.956'	000˚ 7.553'	Core sample	25	62	110	22	A	9.6	N	172.316	88.0587	6.0754
	LB1B2	LB1	100	Labuerda	042˚27.956'	000˚ 7.553'	Core sample	45	58	110	22	B	9.9	N	298.429	75.3092	0.6333
	LB1B4	LB1	100	Labuerda	042˚27.956'	000˚ 7.553'	Core sample	45	58	110	22	A	22.2	N	91.4687	35.6099	0.344
	AR7B1	AR7	70	Gerbe	042˚23.769'	000˚ 11.364'	Hand sample	23	2	180	22	B	29.3	N	6.93226	32.1809	0.2417
	AR6B1B	AR6	60	Gerbe	042˚,23',45.78"	000˚,11',22.08"	Hand sample	278	34	91	22	C	N/A	N/A	N/A	N/A	0.286
	AR6B1A	AR6	60	Gerbe	042˚,23',45.79"	000˚,11',22.09"	Hand sample	278	34	91	22	C	N/A	N/A	N/A	N/A	0.052
	AR6A1	AR6	50	Gerbe	042˚23.763'	000˚ 11.368'	Hand sample	82	69	180	22	A	16	N	328.683	41.7509	0.2057
	AR4B1	AR4	30	Gerbe	042˚23.757'	000˚ 11.383'	Hand sample	300	58	180	22	C	na	N/A	na	na	0.1856
	AR3A1	AR3	20	Gerbe	042˚23.737'	000˚ 11.396'	Hand sample	280	30	174	24	B	12.7	N	343.525	39.5543	0.2124
	AR2A2A	AR2	10	Gerbe	042˚,23',44.16"	000˚,11',23.88"	Hand sample	94	70	94	20	B	25.96	R?	136.5	-24.6	0.09
	AR2A1A	AR2	10	Gerbe	042˚,23',44.17"	000˚,11',23.89"	Hand sample	94	70	94	20	C	N/A	N/A	N/A	N/A	0.575
	AR2B2	AR2	10	Gerbe	042˚23.736'	000˚ 11.398'	Hand sample	94	70	184	20	B	15.3	R	335.214	17.4137	0.1748
	AR1A2	AR1	0	Gerbe	042˚23.729'	000˚ 11.412'	Hand sample	170	80	186	21	B	7.7	R	326.791	39.2431	0.0974
